# Supplementary material for: Single-molecule insight into Wurtz reactions on metal surfaces
Source: Royal Society of Chemistry journal article supplement (doi:10.1039/c5cp06459g), 2015-12-14
Supplement: c5cp06459g1.pdf [file c5cp06459g1.pdf]

# Single-Molecule Insight into Wurtz Reaction on Metal Surfaces

Qiang Sun, Liangliang Cai, Yuanqi Ding, Honghong Ma, Chunxue Yuan  
and Wei Xu\*

Tongji-Aarhus Joint Research Center for Nanostructures and Functional Nanomaterials,  
College of Materials Science and Engineering, Tongji University, Caoan Road 4800,  
Shanghai 201804, P. R. China

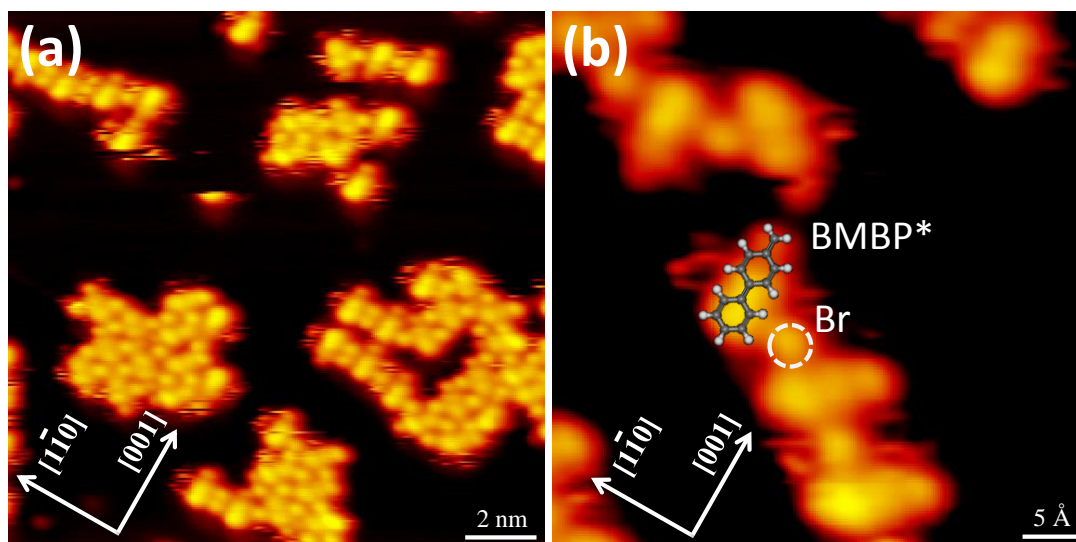

**Figure S1.** (a) Large-scale and (b) close-up STM images showing after deposition of BMBP on Cu(110) at  $\sim 150\text{K}$ . A scaled model of debrominated BMBP is overlaid on the corresponding STM image, and a detached Br atom is indicated by a dashed circle.

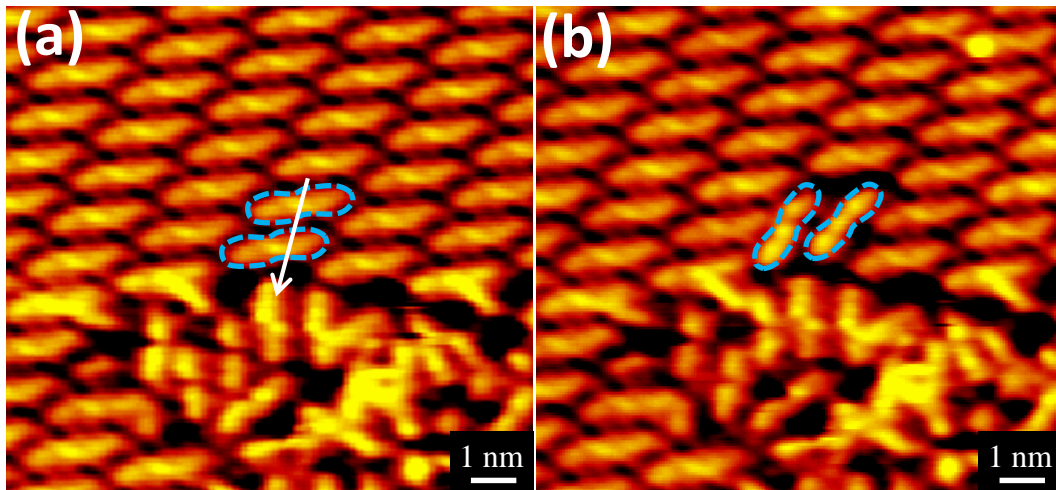

**Figure S2.** STM images showing (a) before and (b) after a lateral STM manipulation on the BMBP dimers (indicated by the blue dashed contours). The BMBP dimers are moved/rotated as a whole, respectively, after the STM manipulation, which confirms the C-C coupling within the dimer structure.
